# Supplementary material
Source: PubMed Central journal article supplement (PMC6166726)
Supplement: supp_RA118.004564_138961_1_supp_175588_pcqjh1.pdf [file supp_RA118.004564_138961_1_supp_175588_pcqjh1.pdf]

## Supporting Information

The nature of the DNA substrate influences pre-catalytic conformational changes of DNA polymerase  $\beta$

**Ji Huang<sup>1#</sup>, Khadijeh S. Alnajjar<sup>1</sup>, Mariam M. Mahmoud<sup>1</sup>, Brian Eckenroth<sup>3</sup>, Sylvie Doublé<sup>3</sup>,  
Joann B. Sweasy<sup>1,2\*</sup>**

From the <sup>1</sup>Department of Therapeutic Radiology, Yale University School of Medicine, New Haven, CT 06520; <sup>2</sup>Department of Genetics, Yale University School of Medicine, New Haven, CT 06520; <sup>3</sup>Department of Microbiology and Molecular Genetics, University of Vermont, Burlington, Vermont 05405

<sup>#</sup>Present address: Department of Chemical and Biological Engineering, Northwestern University, Evanston, IL 60208

\*To whom correspondence should be addressed: Joann B. Sweasy: Department of Therapeutic Radiology, Yale University School of Medicine, New Haven, CT 06520; Department of Genetics, Yale University School of Medicine, New Haven, CT 06520; [joann.sweasy@yale.edu](mailto:joann.sweasy@yale.edu); Tel. (203)737-2626; Fax. (203)785-6309.

### *Table of Contents*

**Figure S1:** Single turnover kinetics of different DNA substrates.

**Figure S2:** Determination of  $k_{\text{pol}}$  and  $K_{\text{d}}(\text{dNTP})$  from single turnover kinetics experiments.

**Figure S3:** Confidence contours for the rate constants determined by KinTek Explorer for JS<sub>1+p</sub>T DNA with *model containing the non-covalent step*.

**Figure S4:** Confidence contours for the rate constants determined by KinTek Explorer for JS<sub>1+p</sub>T DNA with *model that does not contain the non-covalent step*.

**Figure S5:** Confidence contours for the rate constants determined by KinTek Explorer for JS<sub>1-p</sub>T DNA with *model that does not contain the non-covalent step*.

**Figure S6:** Confidence contours for the rate constants determined by KinTek Explorer for JS<sub>3+p</sub>T DNA with *model that does not contain the non-covalent step*.

**Figure S7:** Confidence contours for the rate constants determined by KinTek Explorer for JS<sub>3-p</sub>T DNA with *model that does not contain the non-covalent step*.

**Figure S8:** Confidence contours for the rate constants determined by KinTek Explorer for JS<sub>5+p</sub>T DNA with *model that does not contain the non-covalent step*.

**Figure S9:** Confidence contours for the rate constants determined by KinTek Explorer for JS<sub>5-p</sub>T DNA with *model that does not contain the non-covalent step*.

**Figure S10:** Confidence contours for the rate constants determined by KinTek Explorer for JT DNA with *model that does not contain the non-covalent step*.

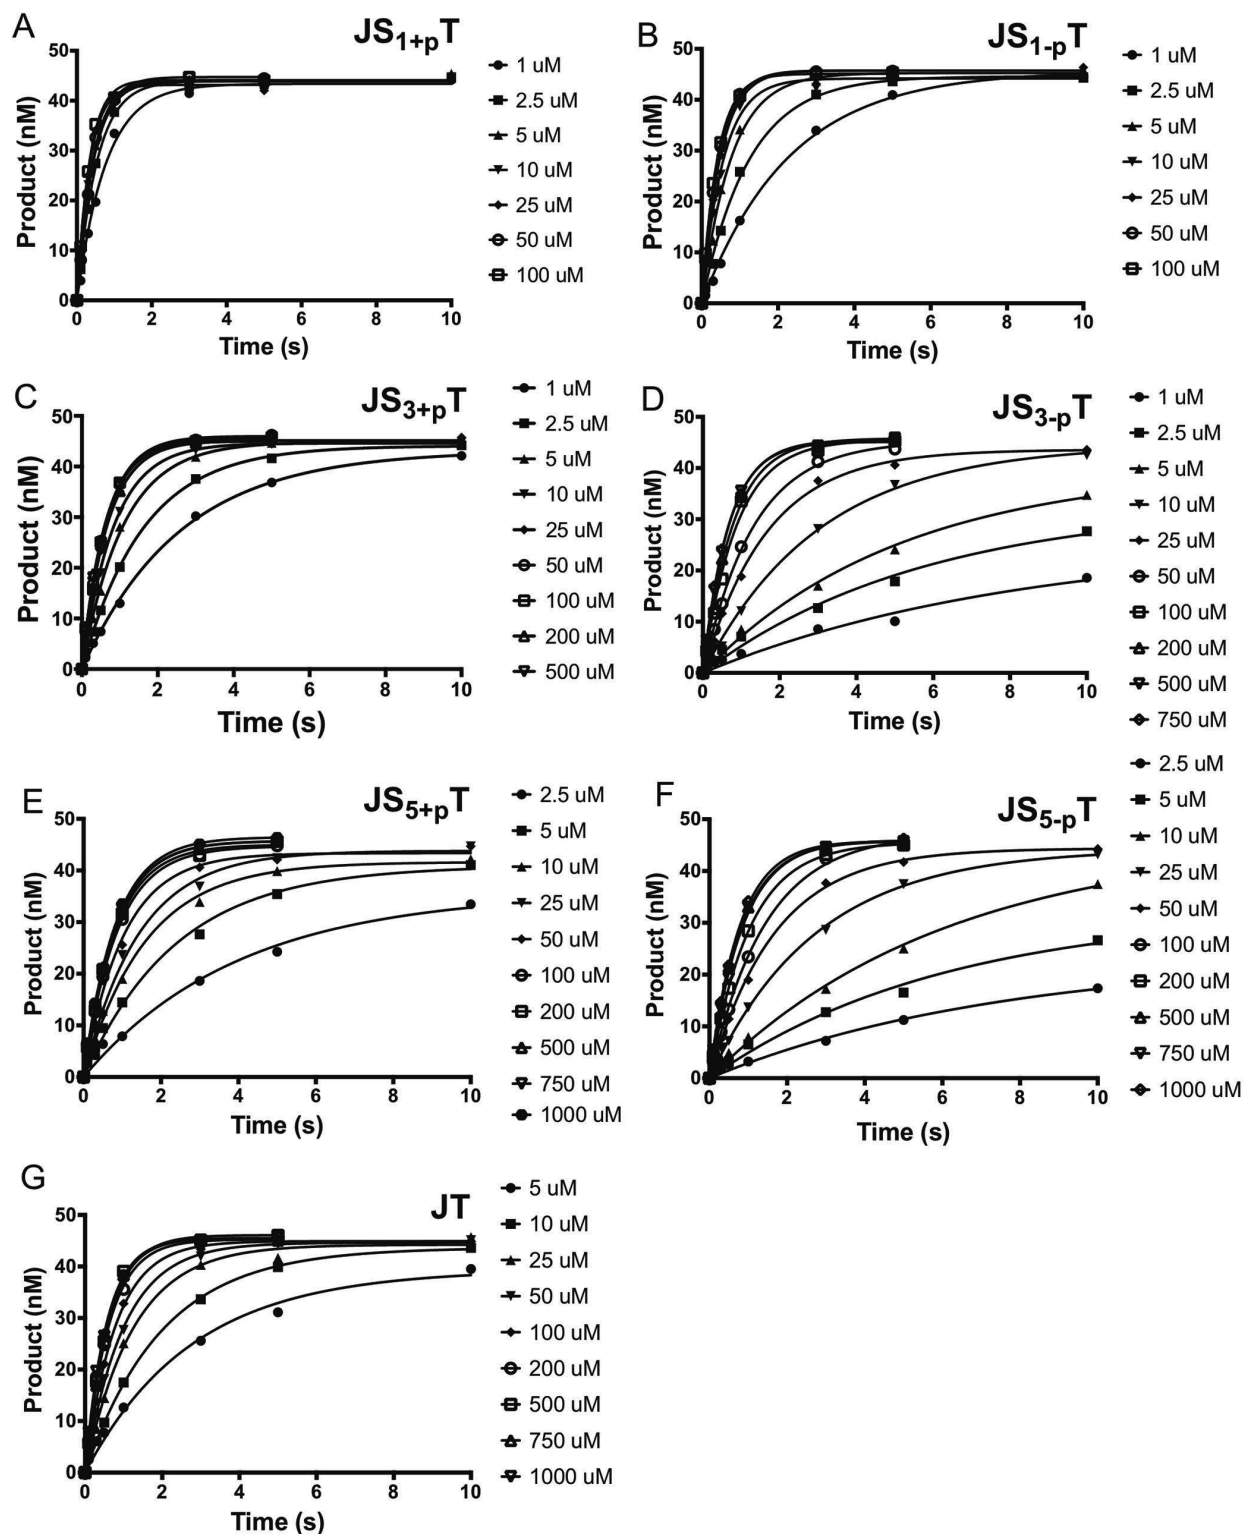

**Figure S1. Single turnover kinetics of different DNA substrates.** The DNA substrates are (A) JS<sub>1+p</sub>T, (B) JS<sub>1-p</sub>T, (C) JS<sub>3+p</sub>T, (D) JS<sub>3-p</sub>T, (E) JS<sub>5+p</sub>T, (F) JS<sub>5-p</sub>T, (G) JT DNA.

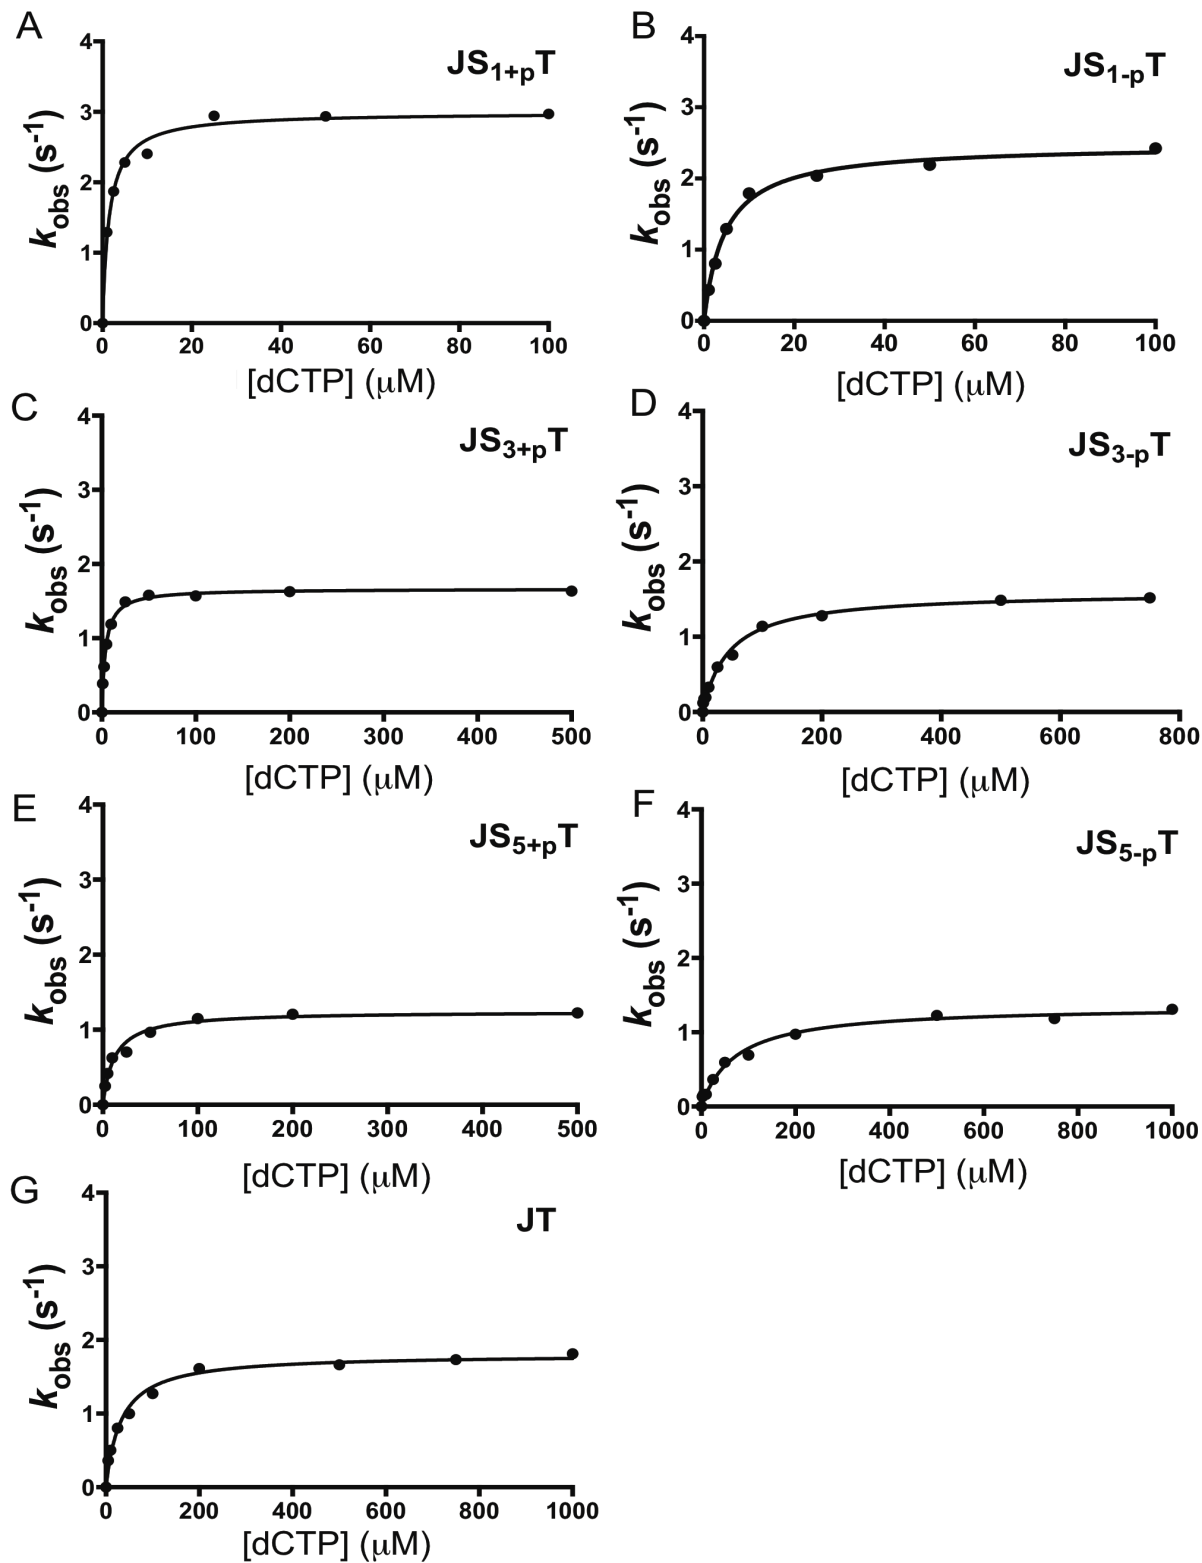

**Figure S2. Determination of  $k_{\text{pol}}$  and  $K_{\text{d}}(\text{dNTP})$  from single turnover kinetics experiments.** The DNA substrates are (A) JS<sub>1+p</sub>T, (B) JS<sub>1-p</sub>T, (C) JS<sub>3+p</sub>T, (D) JS<sub>3-p</sub>T, (E) JS<sub>5+p</sub>T, (F) JS<sub>5-p</sub>T, (G) JT DNA.

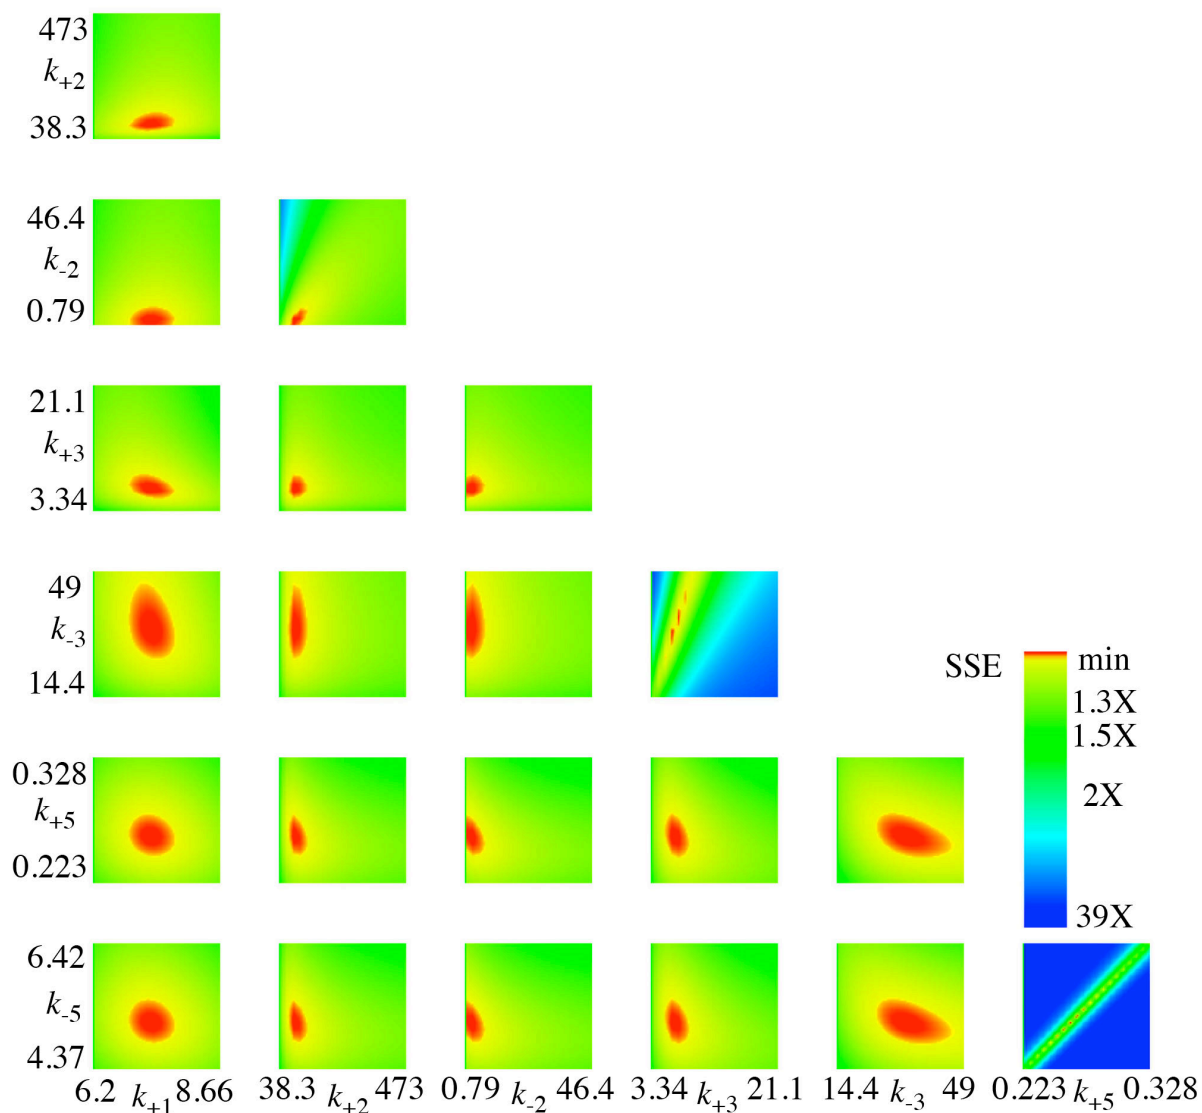

**Figure S3.** Confidence contours for the rate constants determined by KinTek Explorer for JS<sub>1+p</sub>T DNA with *model containing the non-covalent step*. For each case the search was carried out up to a sum of squares error (SSE) that is 2-fold higher than the minimum SSE. The upper and lower limits of each parameter were determined using an SSE threshold of 1.2. A red oval shape indicates the pairs of parameters are well constrained.

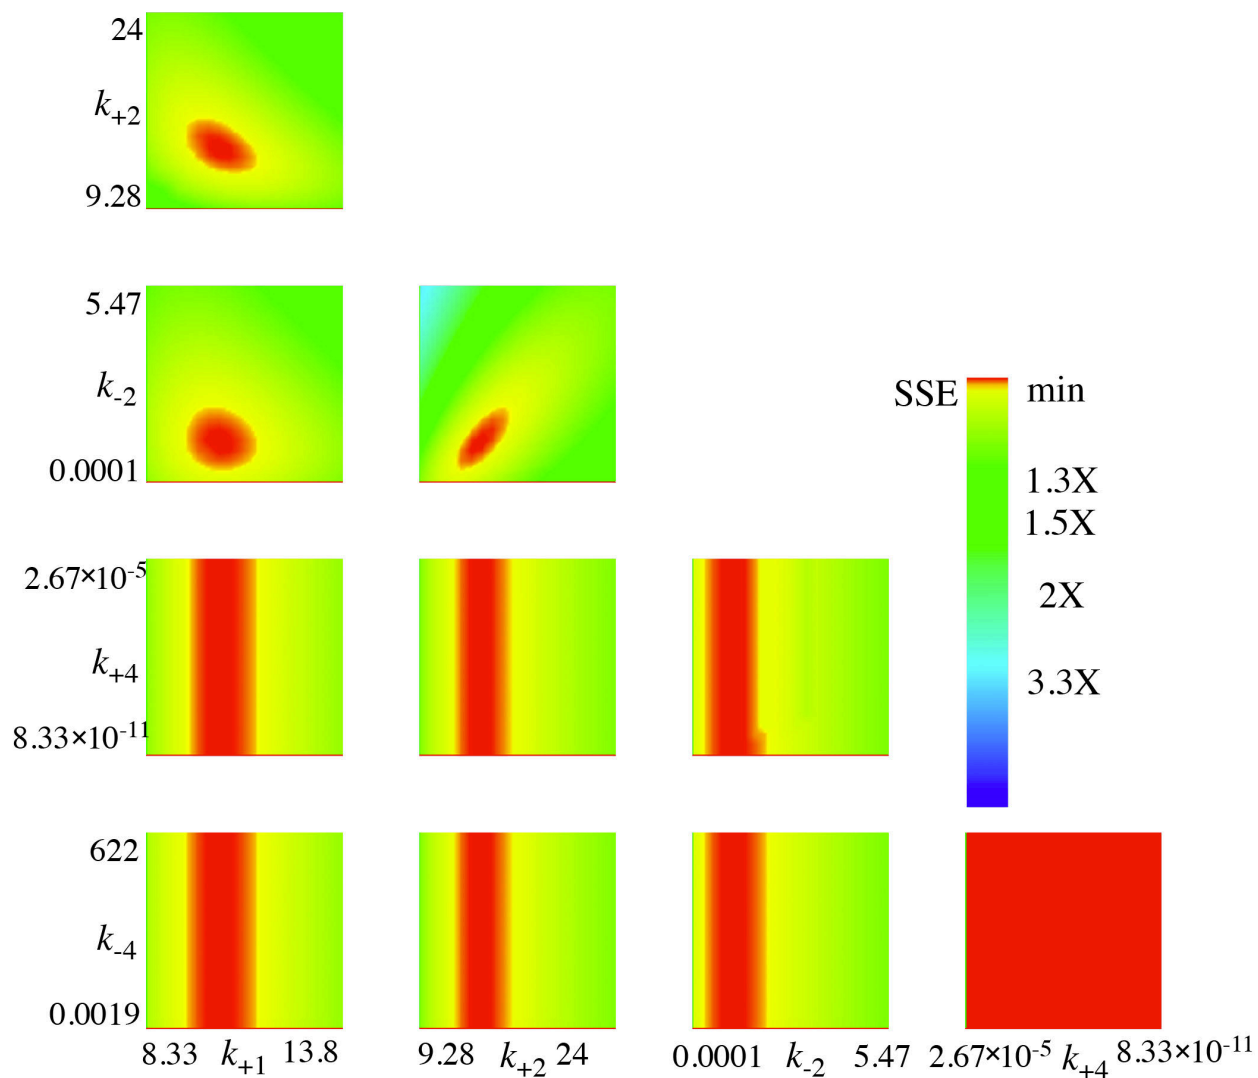

**Figure S4.** Confidence contours for the rate constants determined by KinTek Explorer for JS<sub>1+p</sub>T DNA with *model that does not contain the non-covalent step*. For each case the search was carried out up to a sum of squares error (SSE) that is 2-fold higher than the minimum SSE. The upper and lower limits of each parameter were determined using an SSE threshold of 1.2. A red oval shape indicates the pairs of parameters are well constrained.

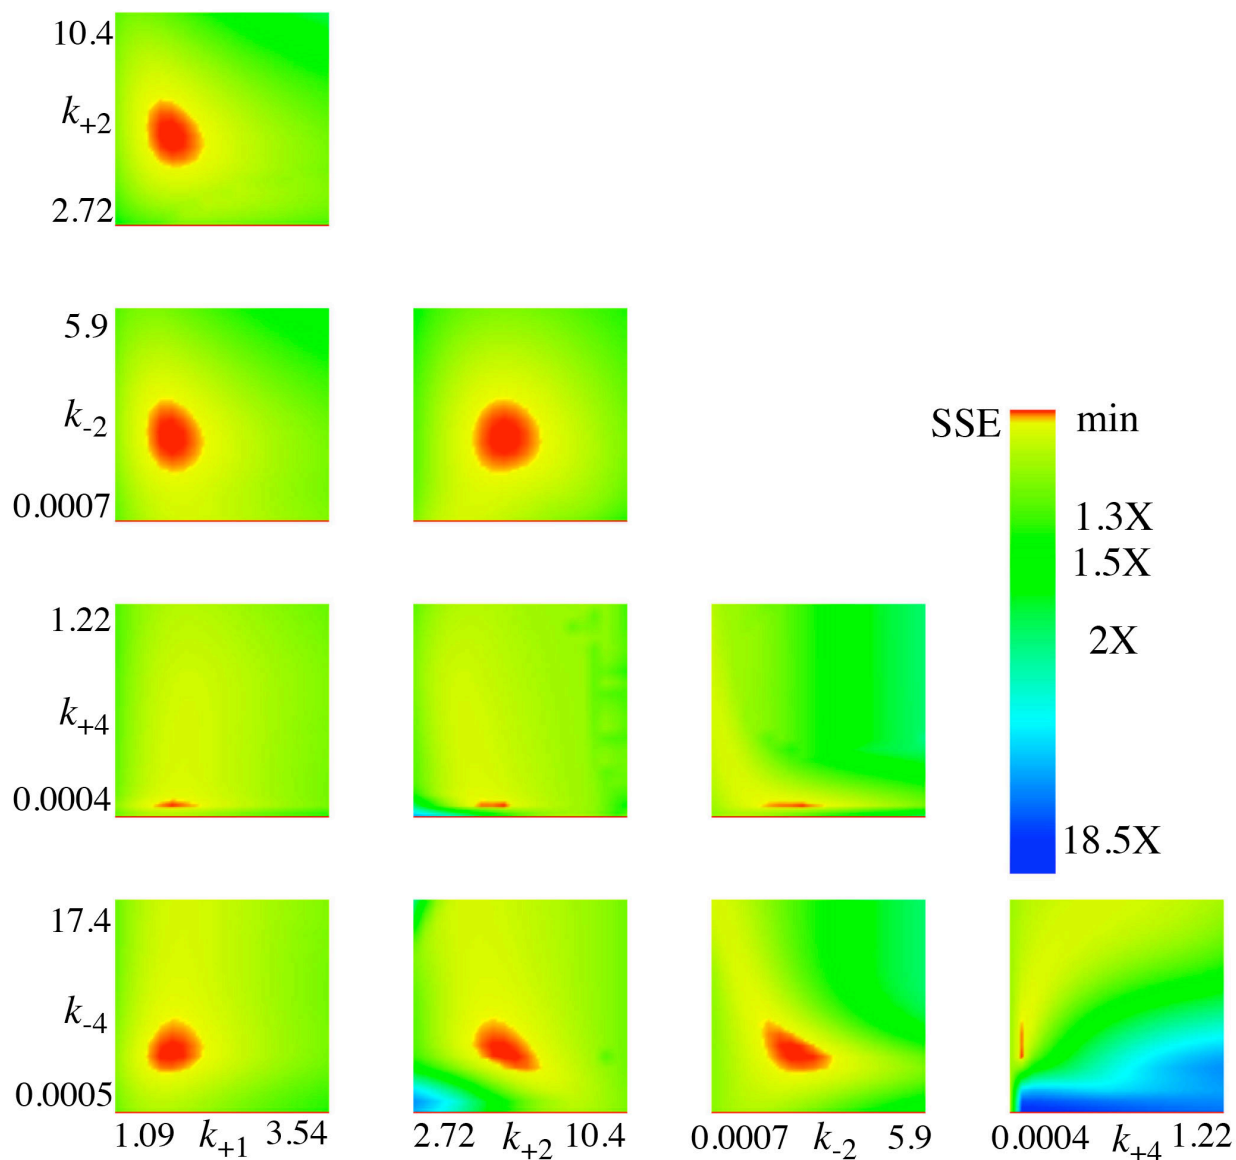

**Figure S5.** Confidence contours for the rate constants determined by KinTek Explorer for JS<sub>1-p</sub>T DNA with *model that does not contain the non-covalent step*. For each case the search was carried out up to a sum of squares error (SSE) that is 2-fold higher than the minimum SSE. The upper and lower limits of each parameter were determined using an SSE threshold of 1.2. A red oval shape indicates the pairs of parameters are well constrained.

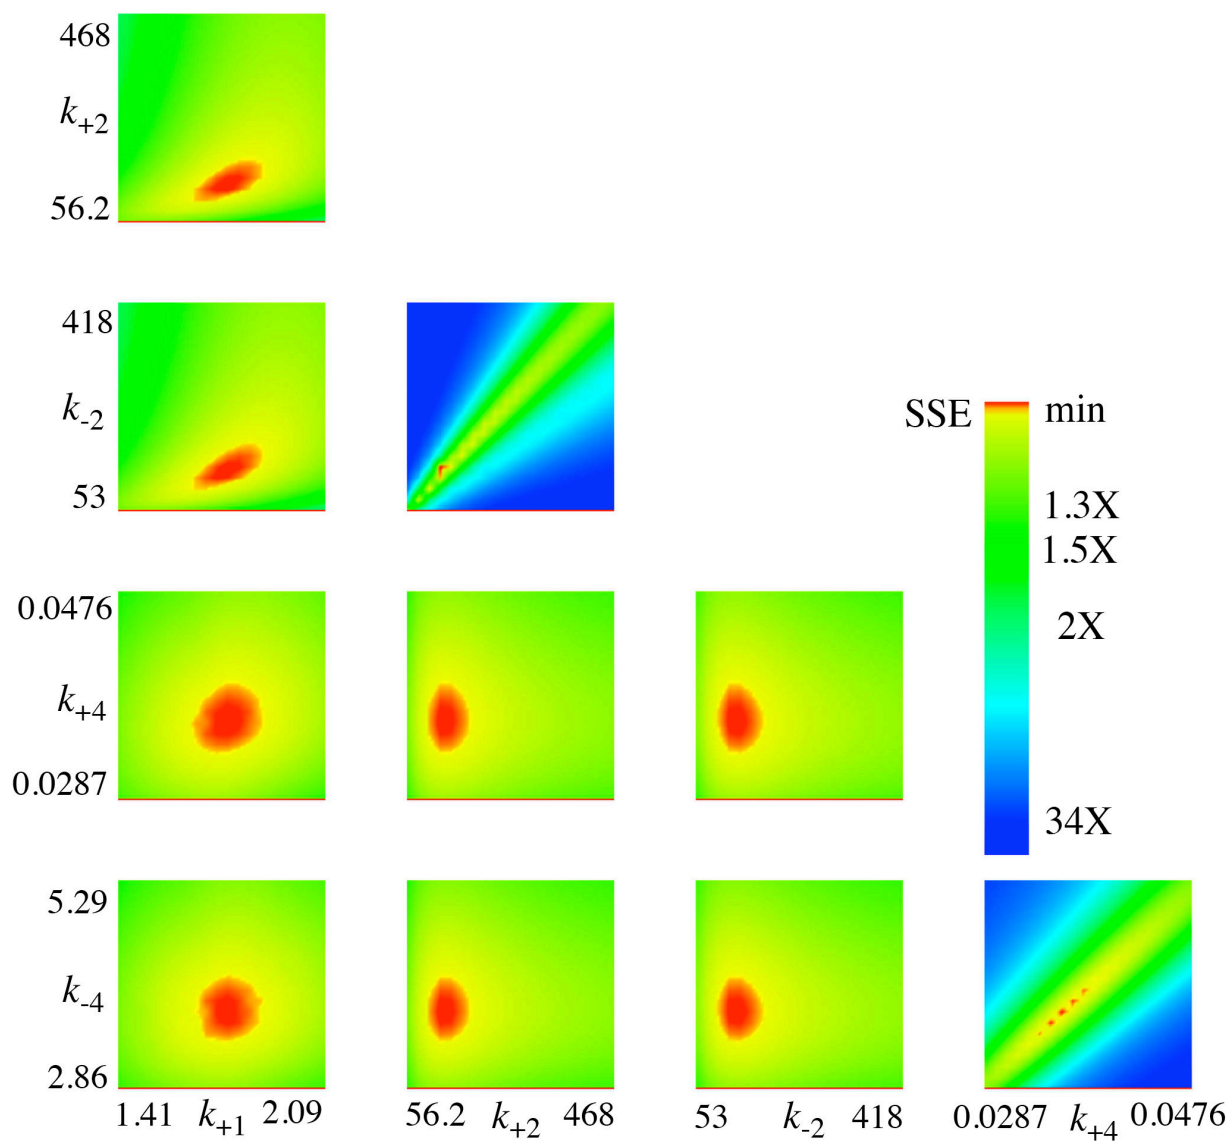

**Figure S6.** Confidence contours for the rate constants determined by KinTek Explorer for JS<sub>3+p</sub>T DNA with *model that does not contain the non-covalent step*. For each case the search was carried out up to a sum of squares error (SSE) that is 2-fold higher than the minimum SSE. The upper and lower limits of each parameter were determined using an SSE threshold of 1.2. A red oval shape indicates the pairs of parameters are well constrained.



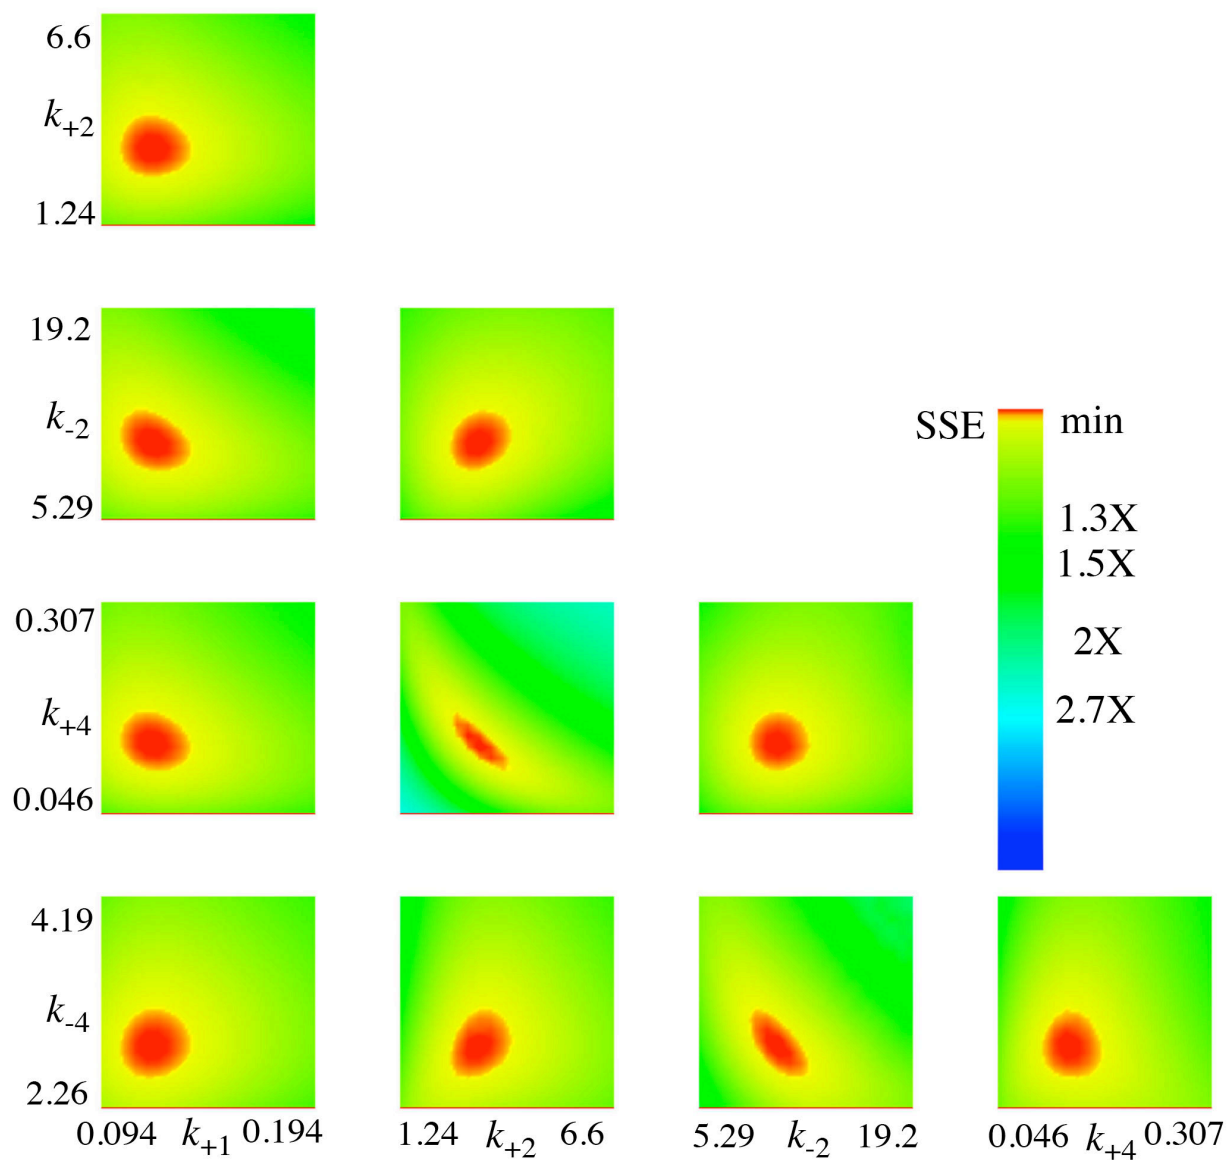

**Figure S7.** Confidence contours for the rate constants determined by KinTek Explorer for JS<sub>3-p</sub>T DNA with *model that does not contain the non-covalent step*. For each case the search was carried out up to a sum of squares error (SSE) that is 2-fold higher than the minimum SSE. The upper and lower limits of each parameter were determined using an SSE threshold of 1.2. A red oval shape indicates the pairs of parameters are well constrained.



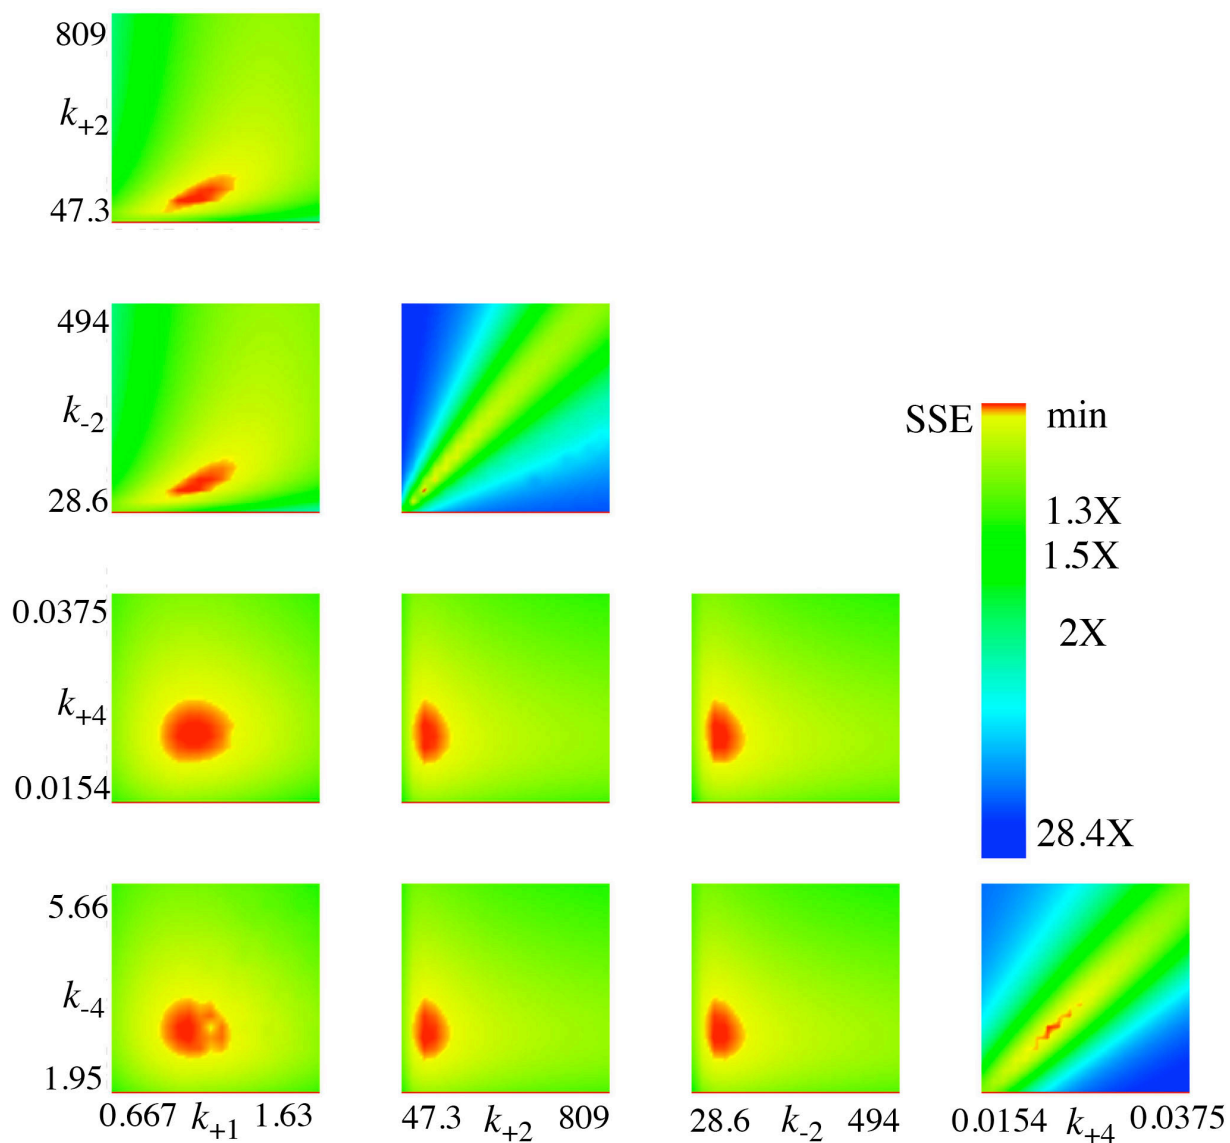

**Figure S8.** Confidence contours for the rate constants determined by KinTek Explorer for JS<sub>5+p</sub>T DNA with *model that does not contain the non-covalent step*. For each case the search was carried out up to a sum of squares error (SSE) that is 2-fold higher than the minimum SSE. The upper and lower limits of each parameter were determined using an SSE threshold of 1.2. A red oval shape indicates the pairs of parameters are well constrained.

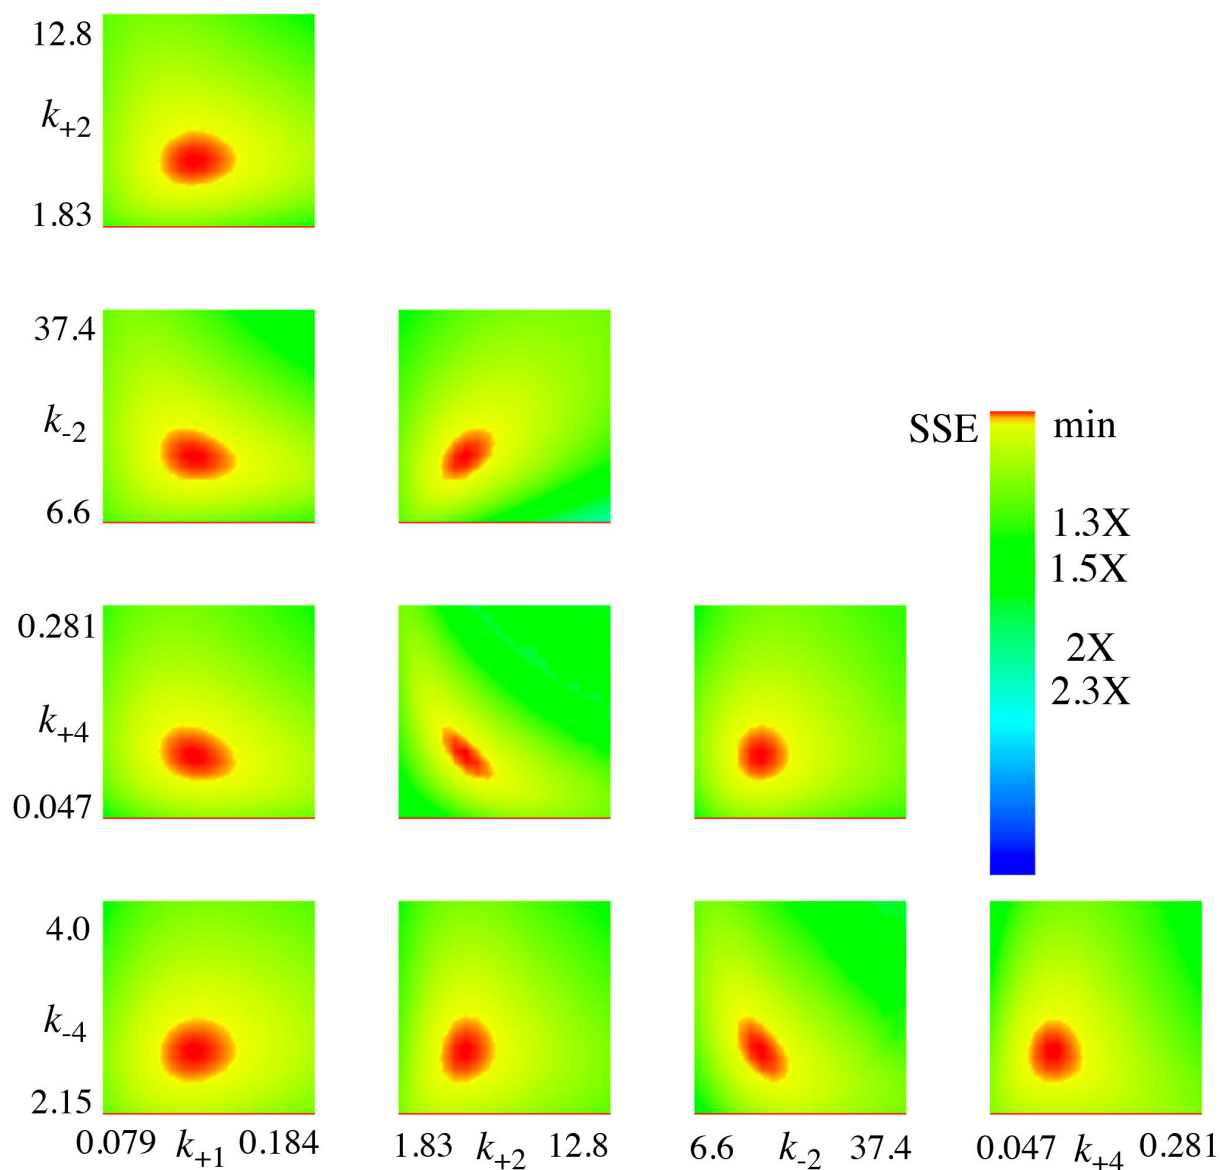

**Figure S9.** Confidence contours for the rate constants determined by KinTek Explorer for JS<sub>5-p</sub>T DNA with *model that does not contain the non-covalent step*. For each case the search was carried out up to a sum of squares error (SSE) that is 2-fold higher than the minimum SSE. The upper and lower limits of each parameter were determined using an SSE threshold of 1.2. A red oval shape indicates the pairs of parameters are well constrained.

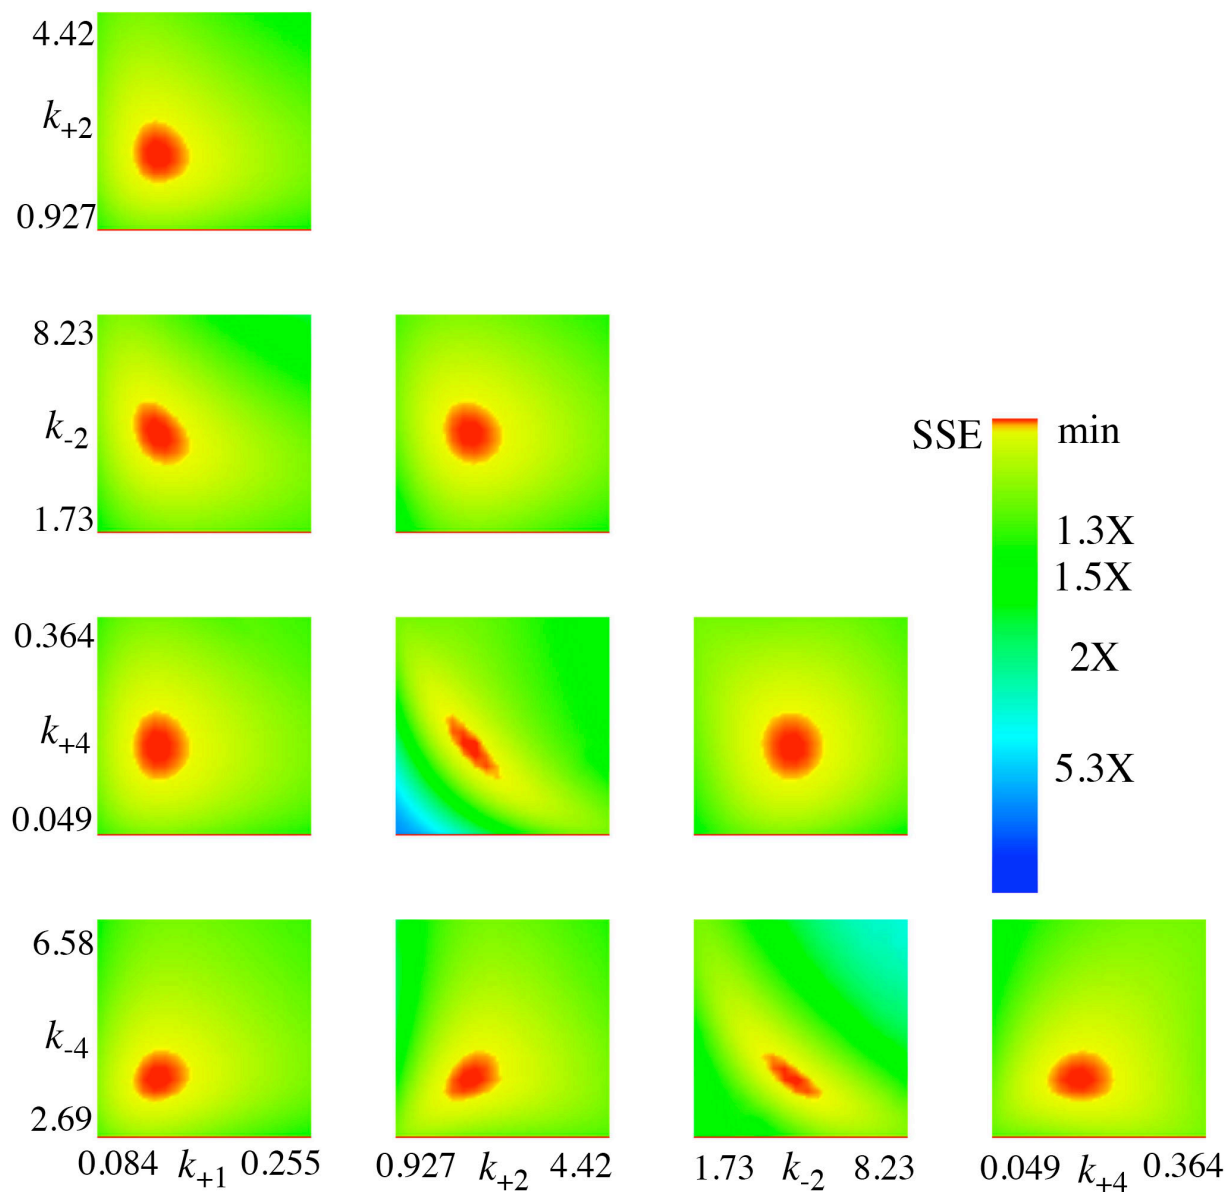

**Figure S10.** Confidence contours for the rate constants determined by KinTek Explorer for JT DNA with *model that does not contain the non-covalent step*. For each case the search was carried out up to a sum of squares error (SSE) that is 2-fold higher than the minimum SSE. The upper and lower limits of each parameter were determined using an SSE threshold of 1.2. A red oval shape indicates the pairs of parameters are well constrained.
